# Supplementary material
Source: PubMed Central journal article supplement (PMC4326076)

$$V_{ss}/F (L) = [TVV_{SS45kg \text{ woman}} (L/45kg) \times \Theta^{\text{gestational age(wks)/40}}] \times LBW/45kg$$

$TVCL_{45kg \text{ woman}}$  and  $TVV_{SS45kg \text{ woman}}$  represent typical values of  $CL/F$  and  $V_{ss}/F$  for a pregnant woman of 45 kg LBW.

### Appendix III Supplementary Figure

#### Figure legend

Goodness of fit plots for betamethasone plasma concentrations using one- and two compartment models with first order absorption and elimination. (A) Observed versus model predicted betamethasone plasma concentrations from the one-compartment model. (B) Weighted residuals versus model predicted betamethasone plasma concentrations from the one-compartment model. (C) Observed versus model predicted betamethasone plasma concentrations from the two-compartment model. (D) Weighted residuals versus model predicted betamethasone plasma concentrations from the two-compartment model. The solid line in (A) and (C) represents the line of identity. The solid line in (B) and (D) represents the zero-intercept line.

## Supplementary Figure

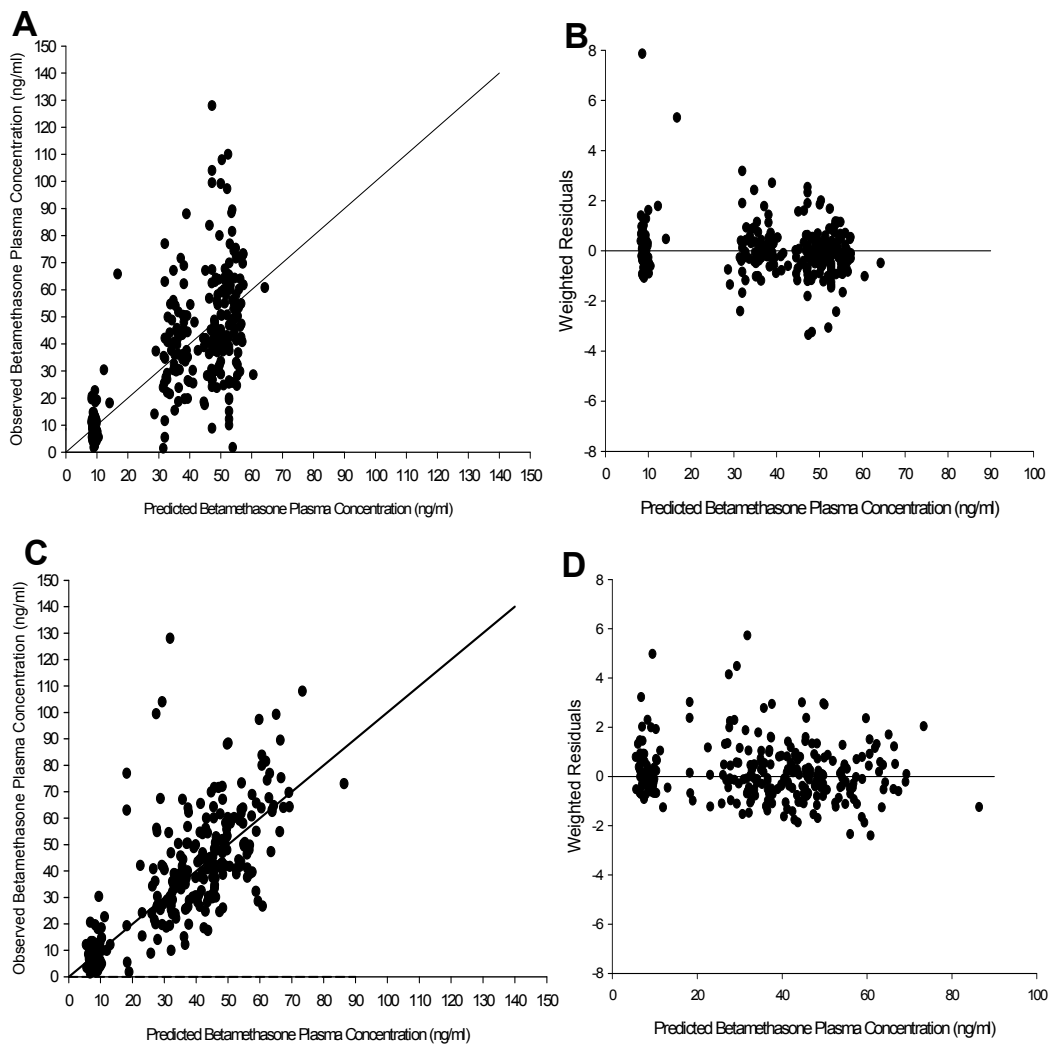

Supplement: NIHMS479959-supplement-supplement_1.pdf [file NIHMS479959-supplement-supplement_1.pdf]
